# Supplementary material for: Processing Coalmine Overburden Waste Rock as Replacement to Natural Sand: Environmental Sustainability Assessment
Source: MDPI journal article supplement (doi:10.3390/su142214853), 2022-11-10

# **Supplementary Materials: Processing Coalmine Overburden Waste Rock as Replacement to Natural Sand: Environmental Sustainability Assessment**

Anshumali Mishra <sup>1</sup>, Sarat Kumar Das <sup>1</sup> and Krishna R. Reddy <sup>2,\*</sup>

### Abiotic Depletion

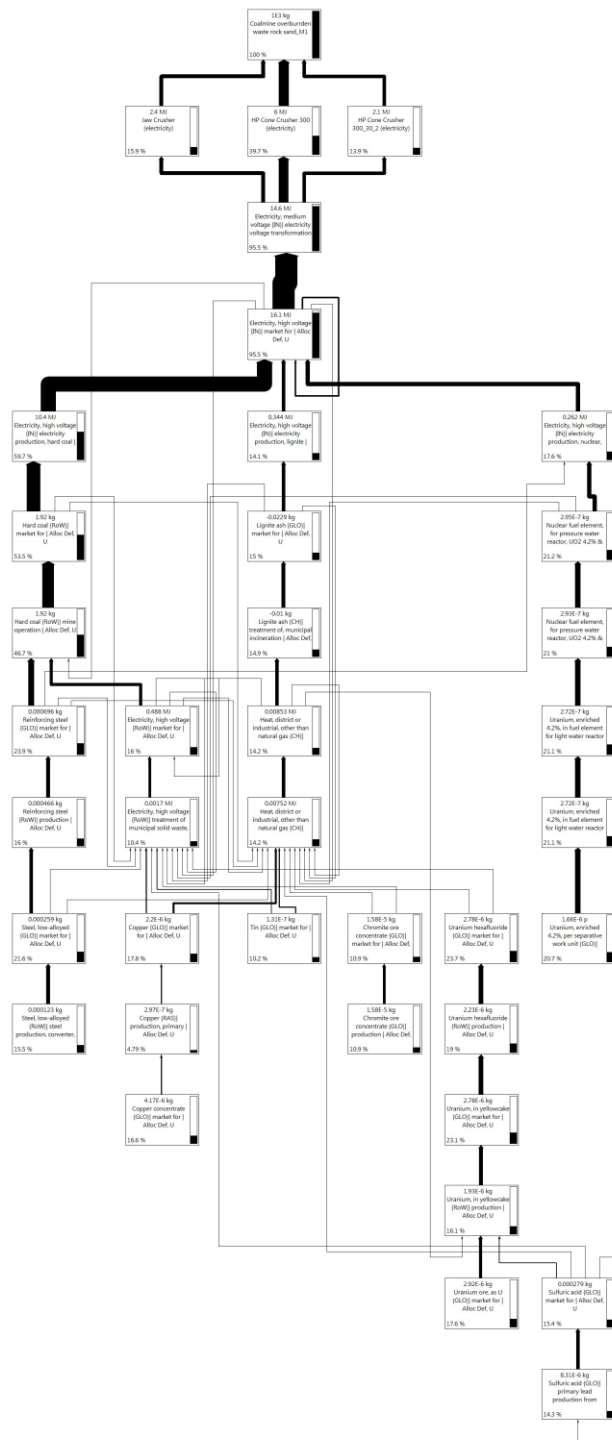

## Abiotic Depletion Fossils

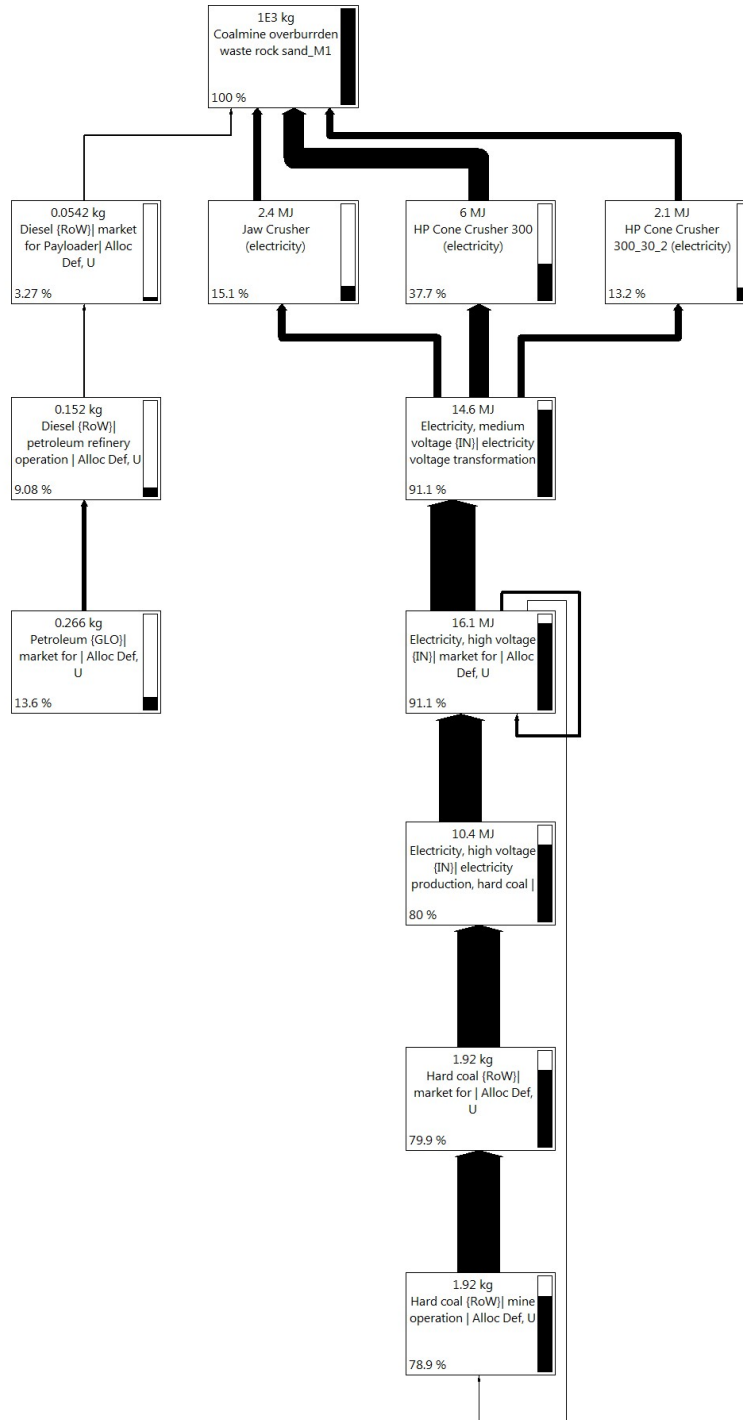

Global Warming Potential

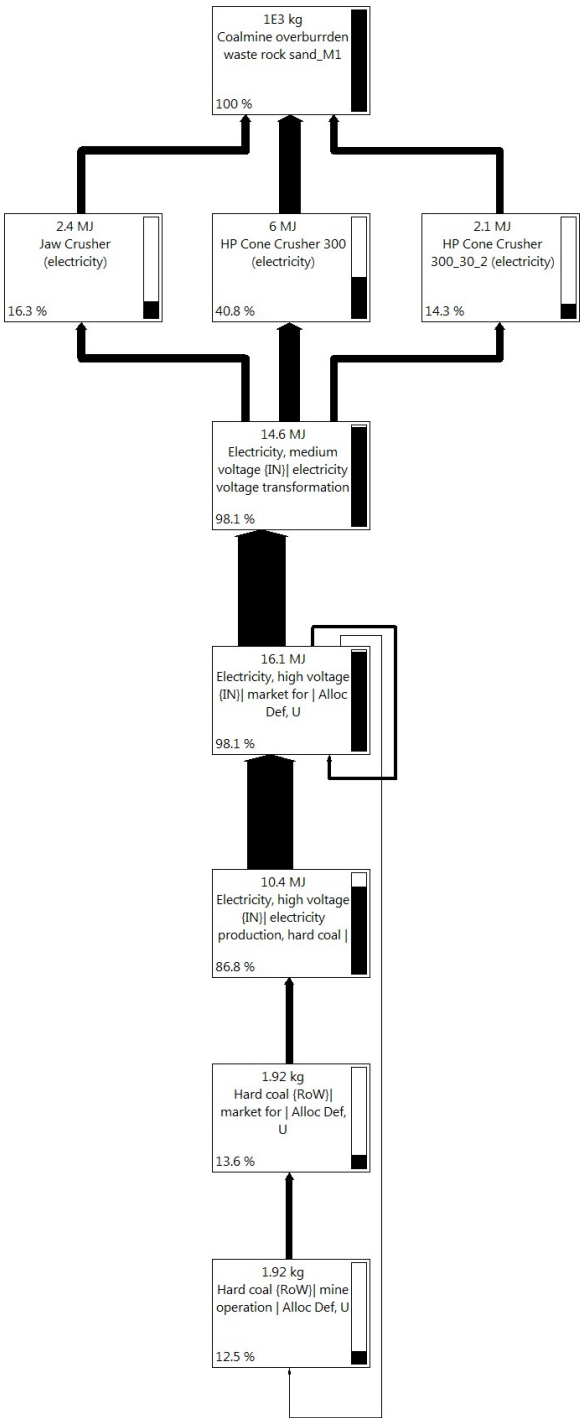

## Ozone Depletion Potential

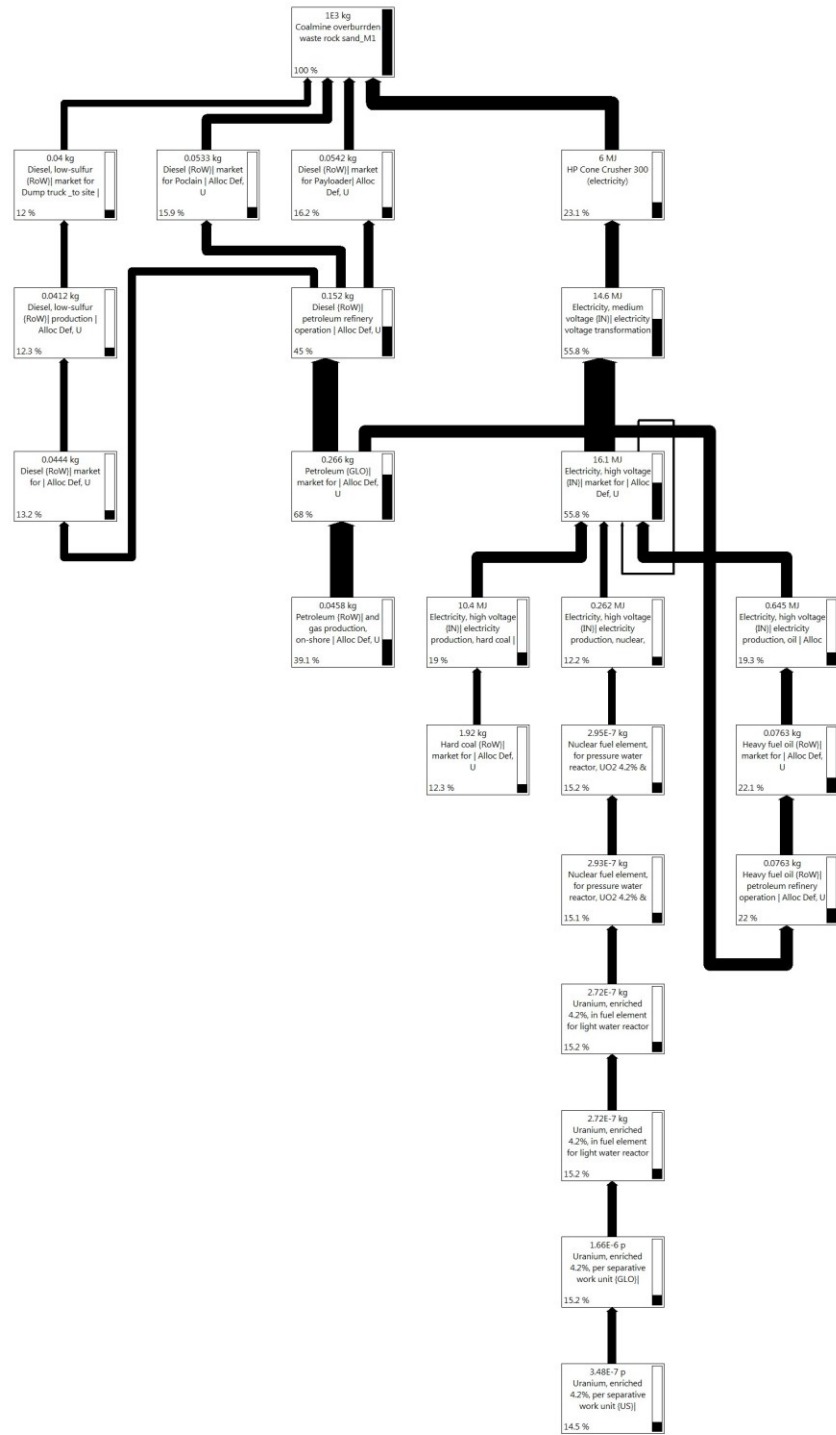

## Human Toxicity

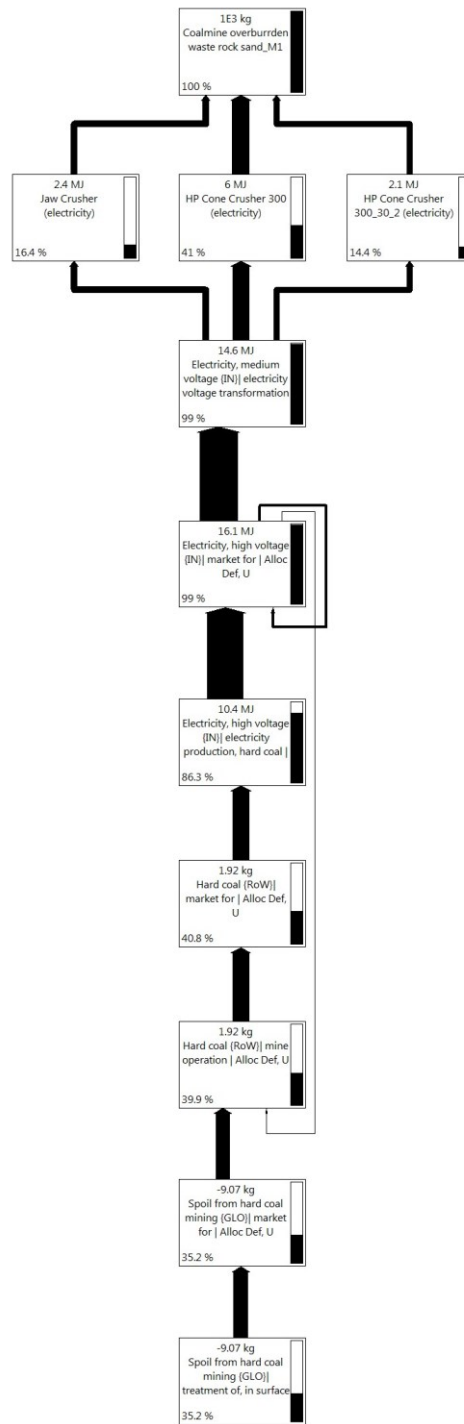

## Fresh Water Aquatic Ecotoxicity

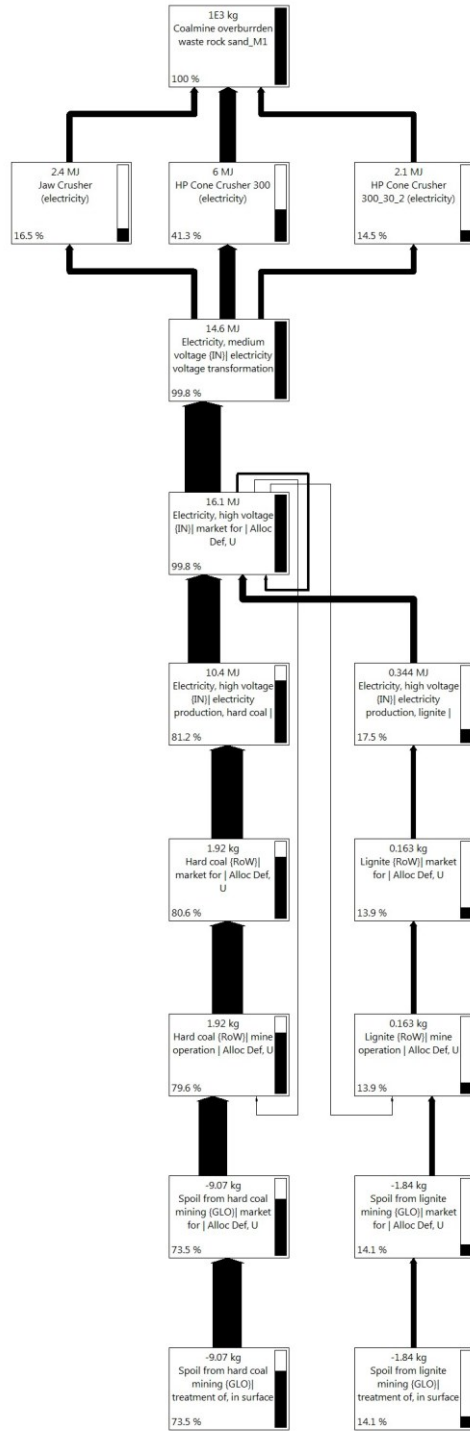

## Marine Aquatic Ecotoxicity

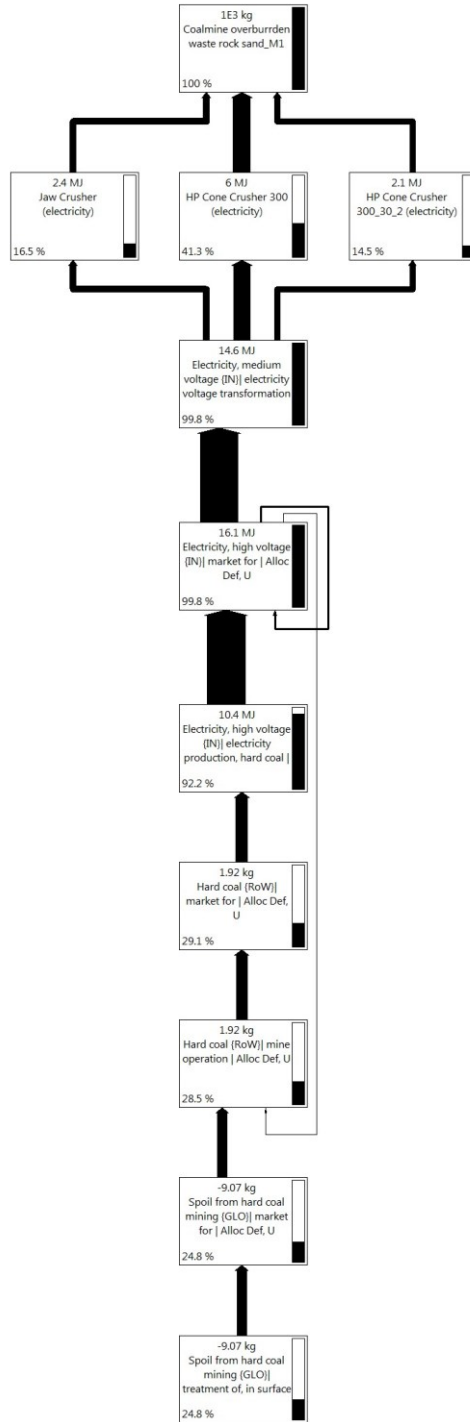



## Terrestrial Ecotoxicity

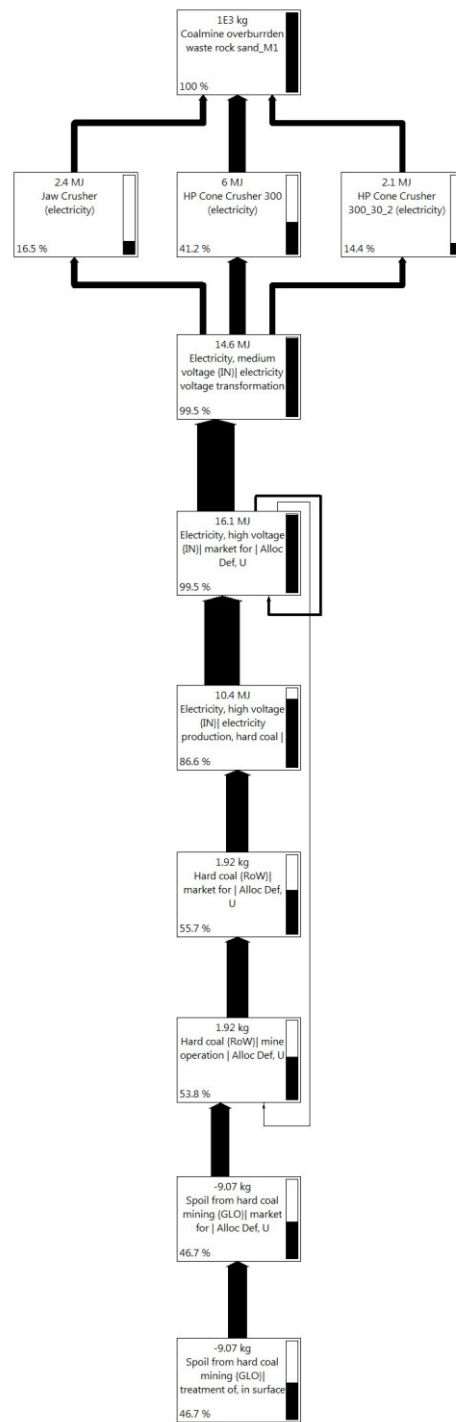

Photochemical Oxidation

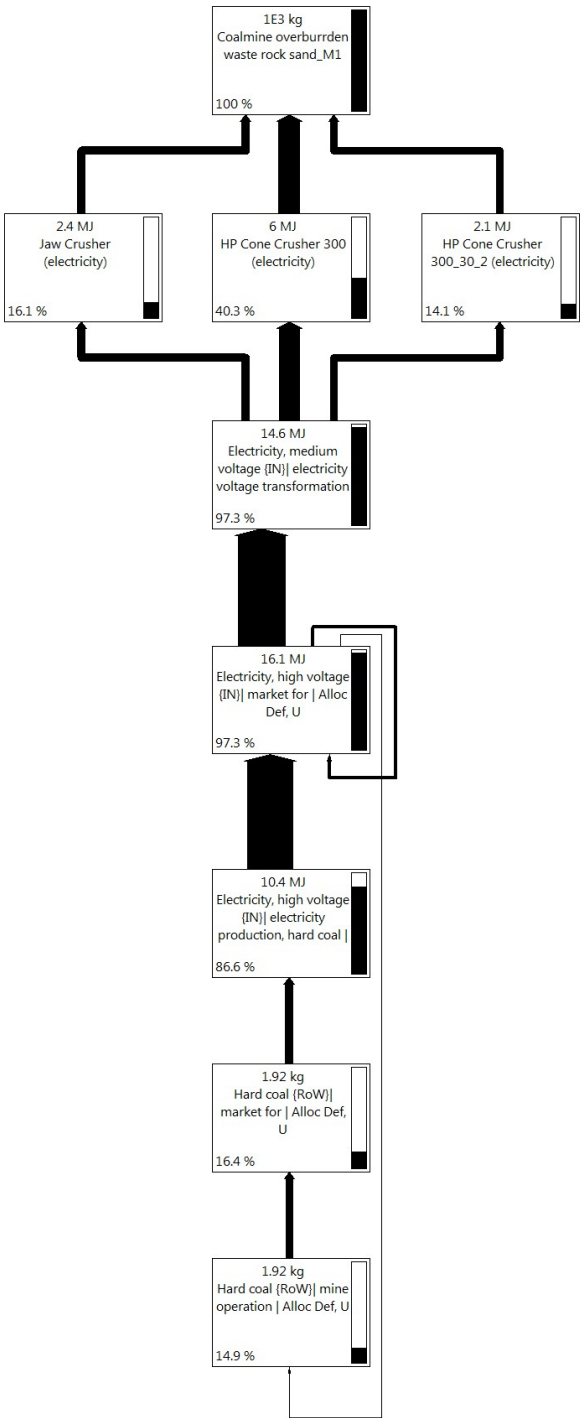

Acidification

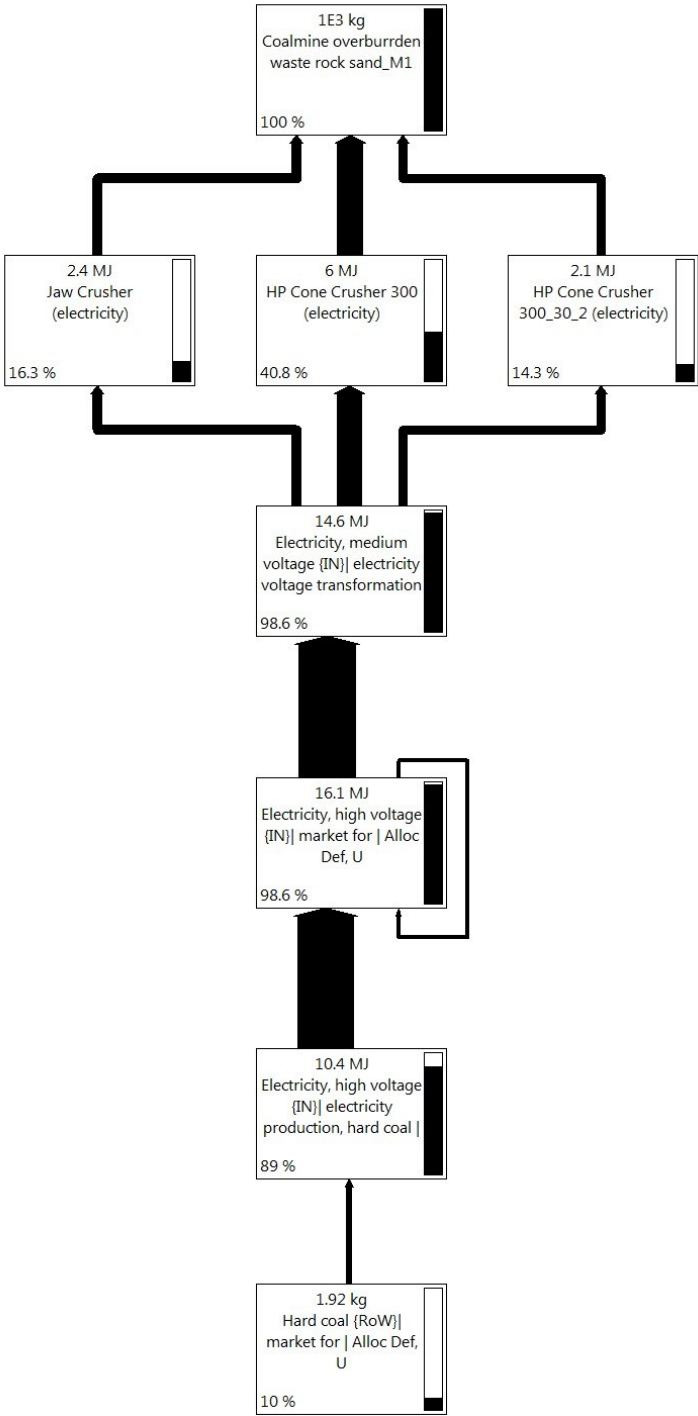

Eutrophication

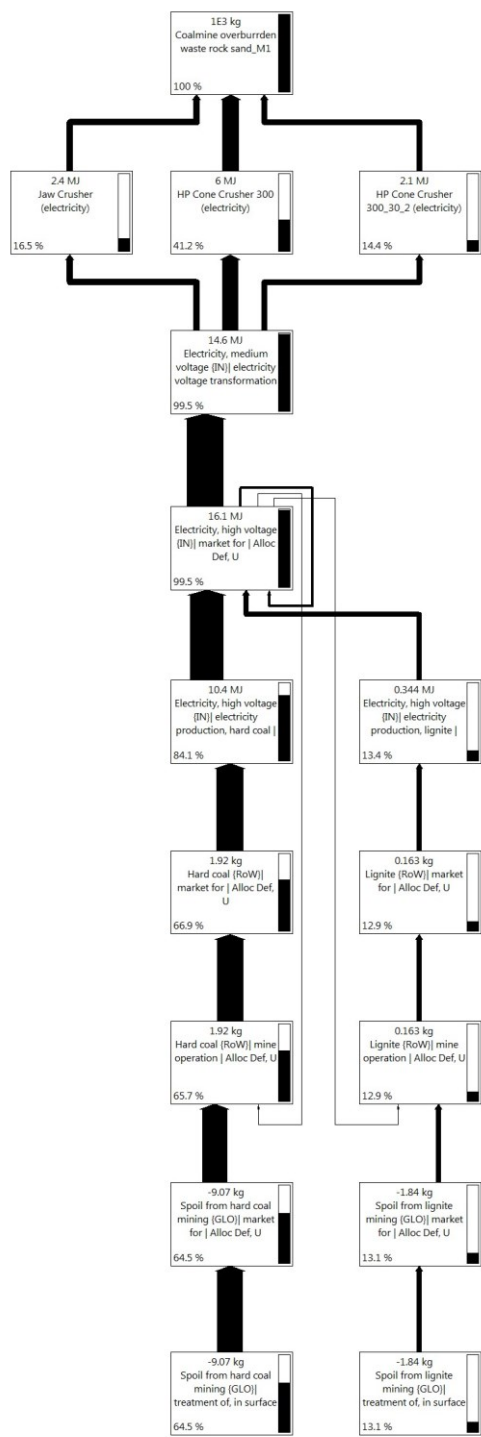

Network diagram for M2 processes subcategory showing its impact on the midpoint indicators at 10 % cut off.

Abiotic Depletion

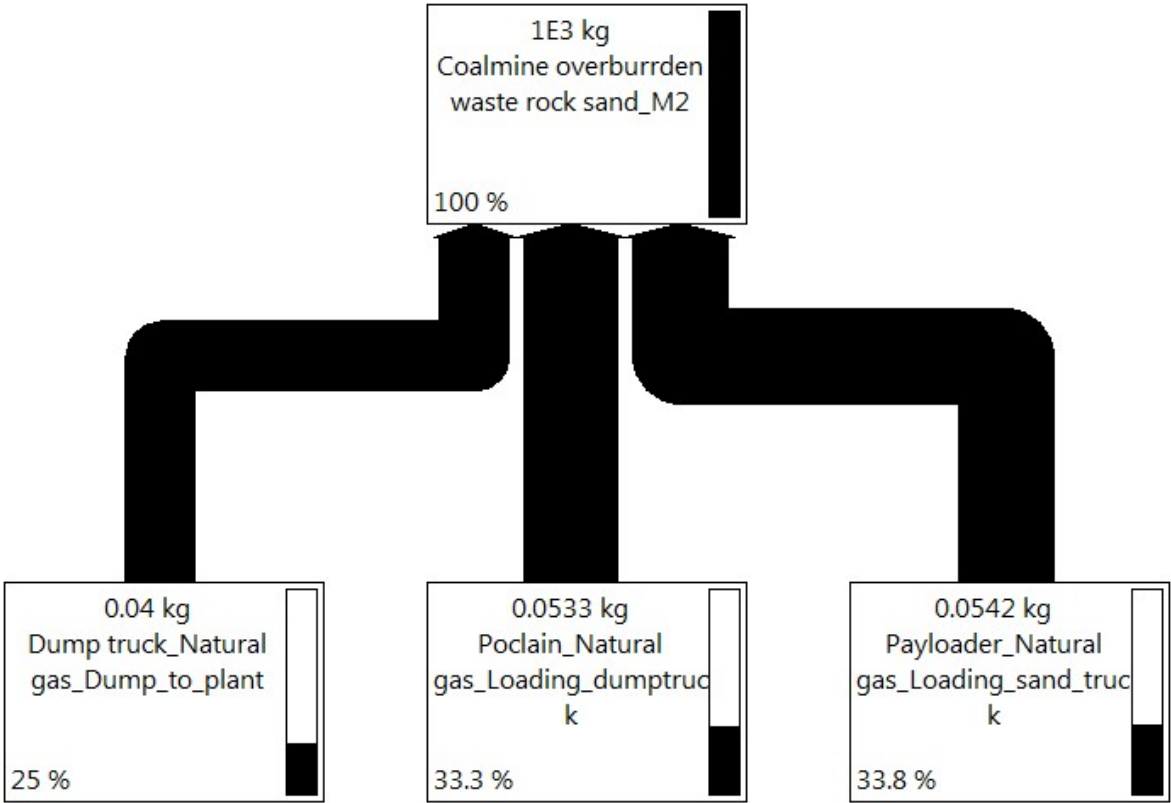

## Abiotic Depletion Fossils

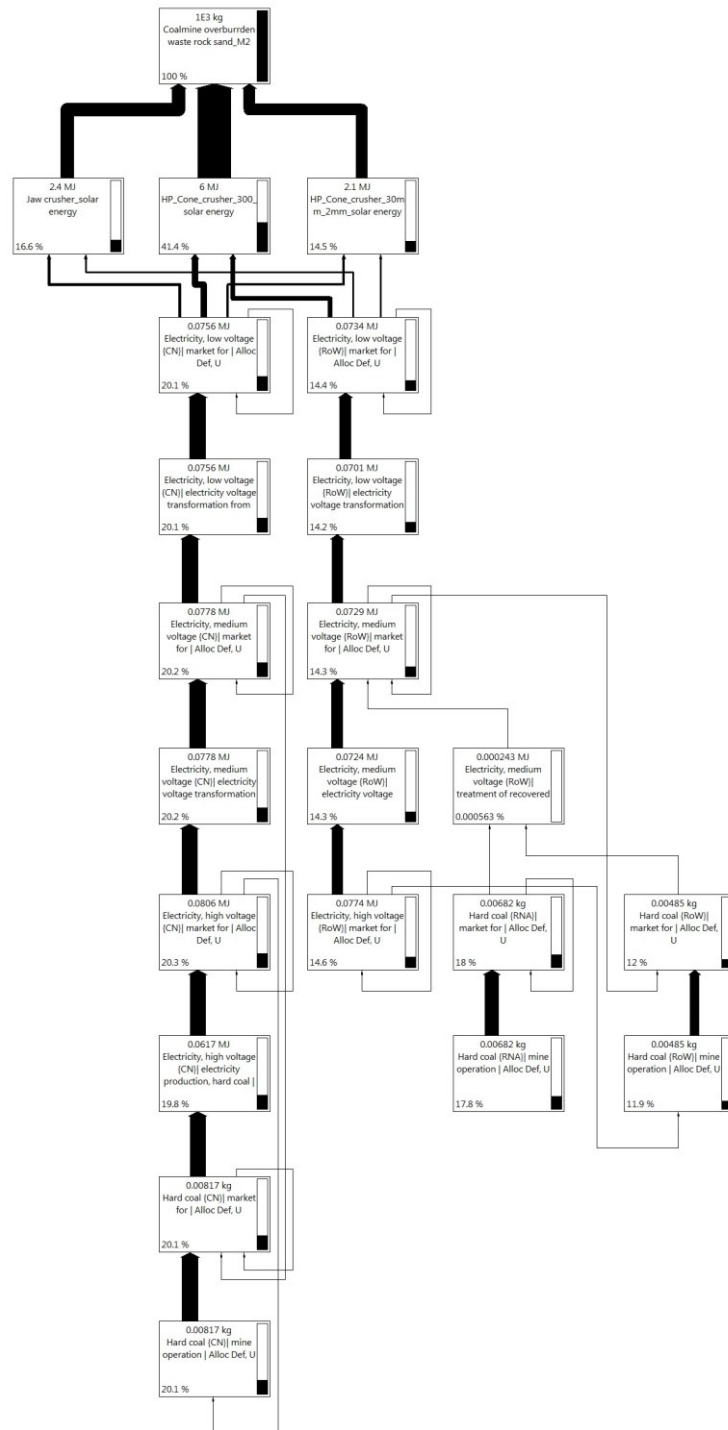

## Global Warming Potential

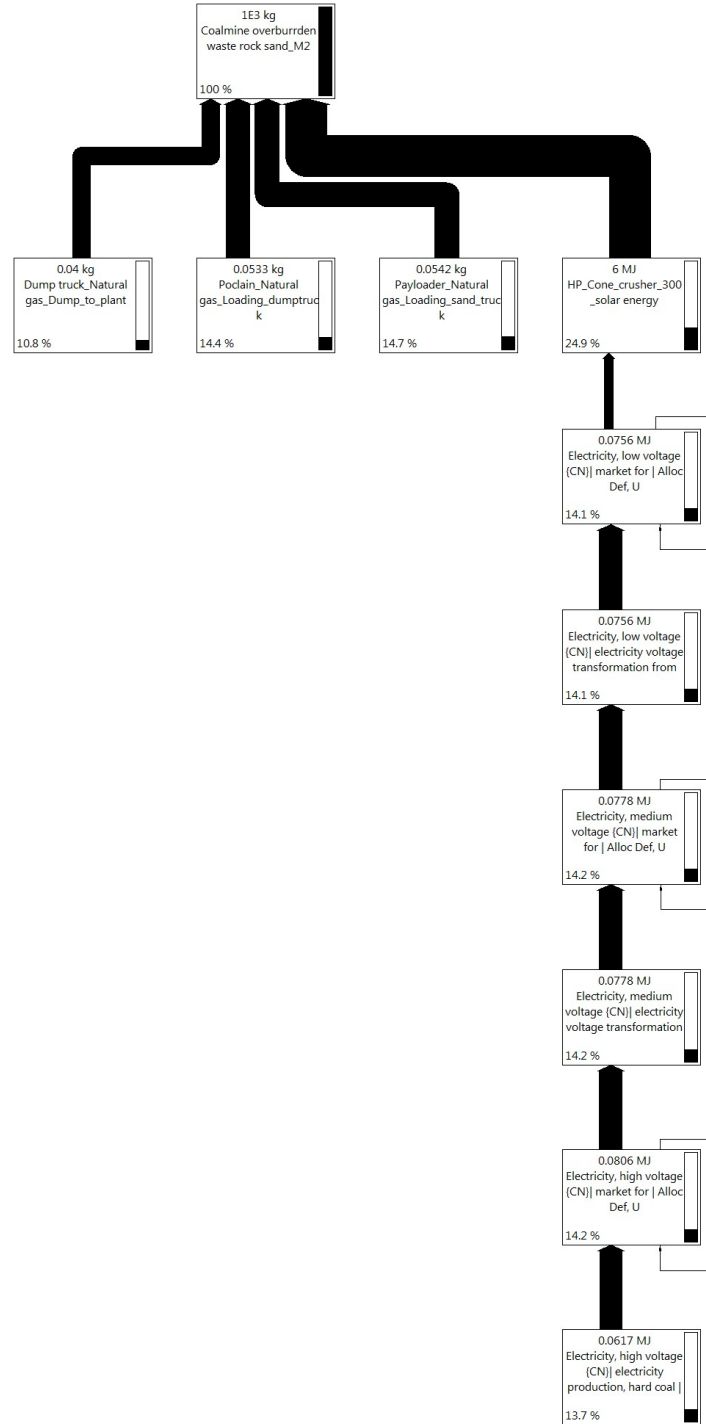

### Ozone Depletion Potential

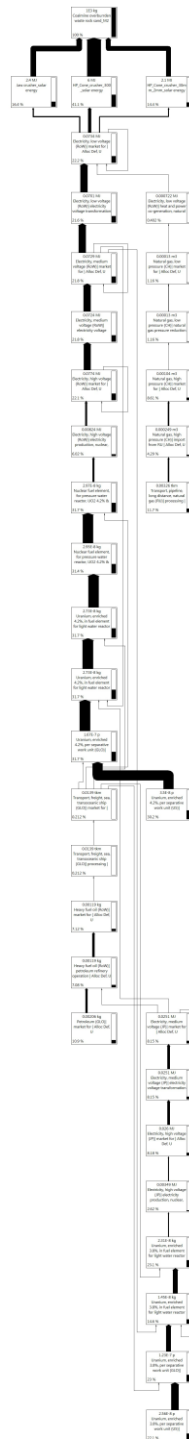



## Human Toxicity

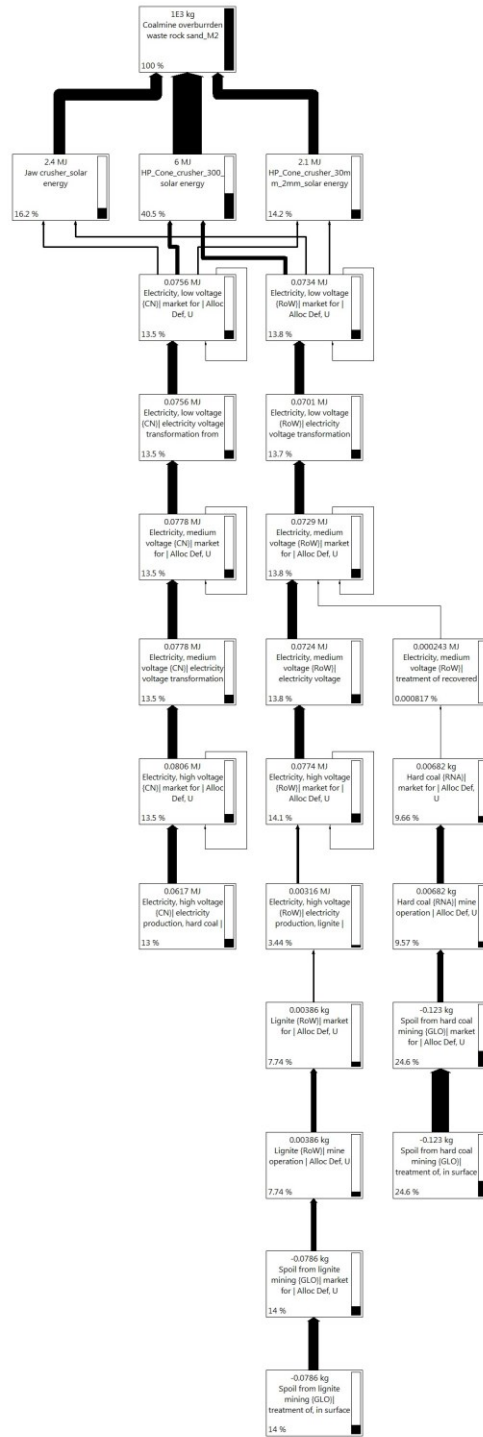

## Fresh Water Aquatic Ecotoxicity

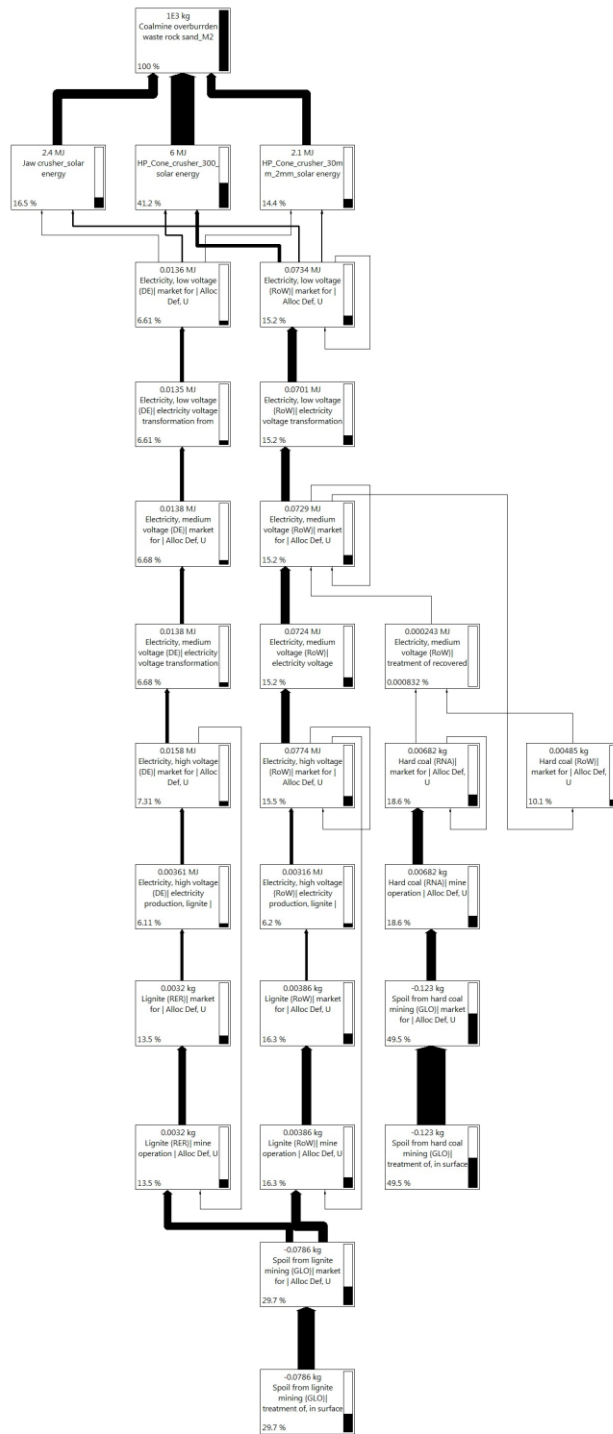

# Marine Aquatic Ecotoxicity

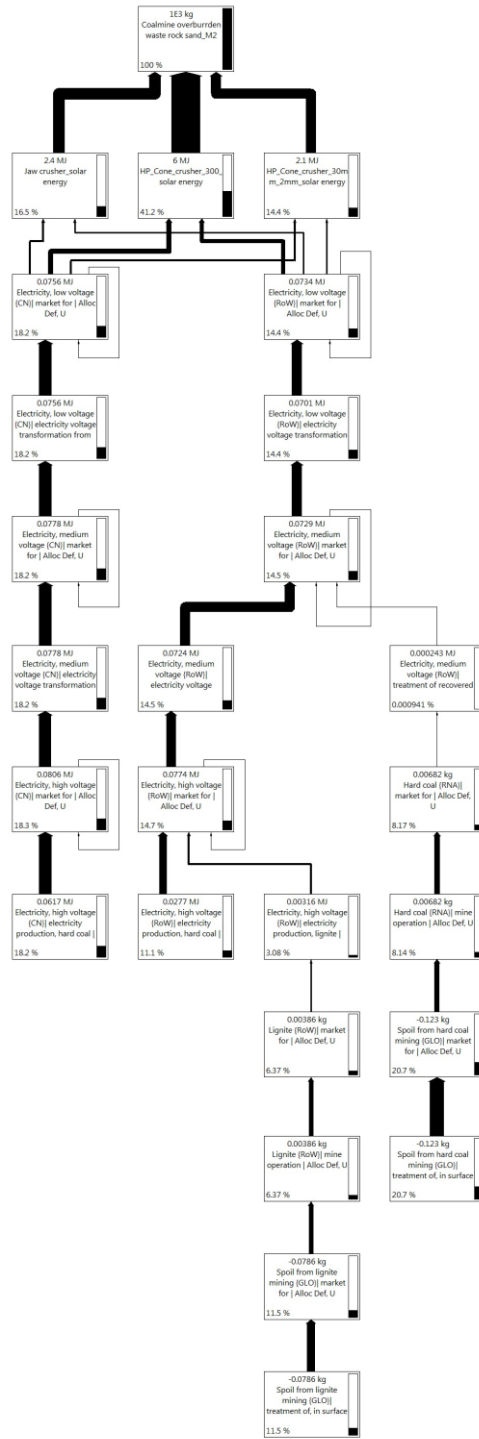

## Terrestrial Ecotoxicity

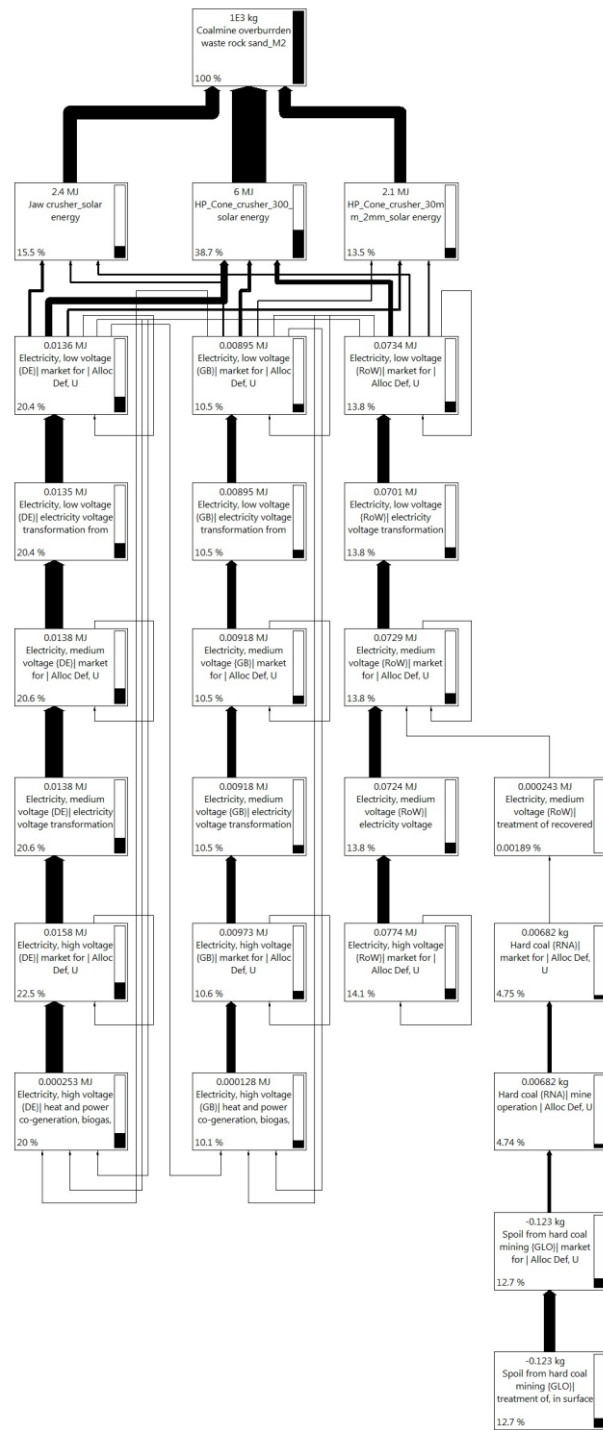

Photochemical Oxidation

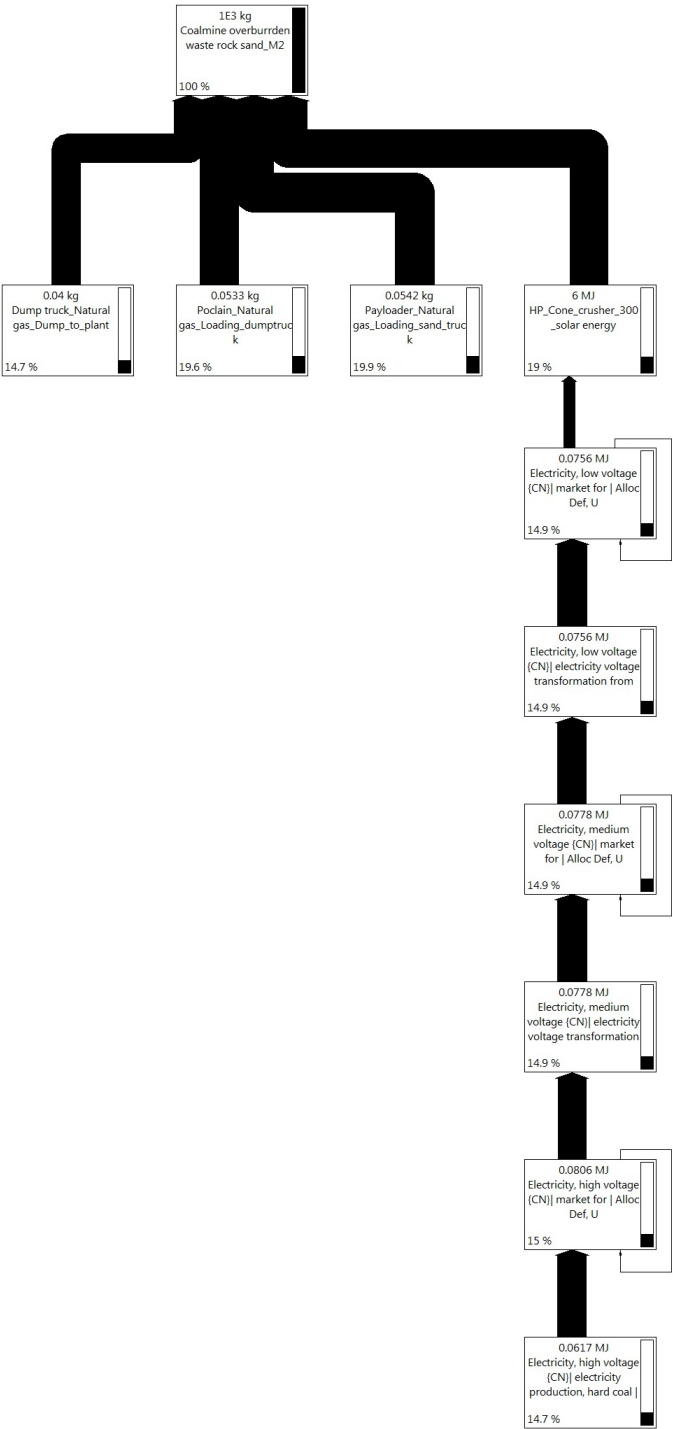

Acidification

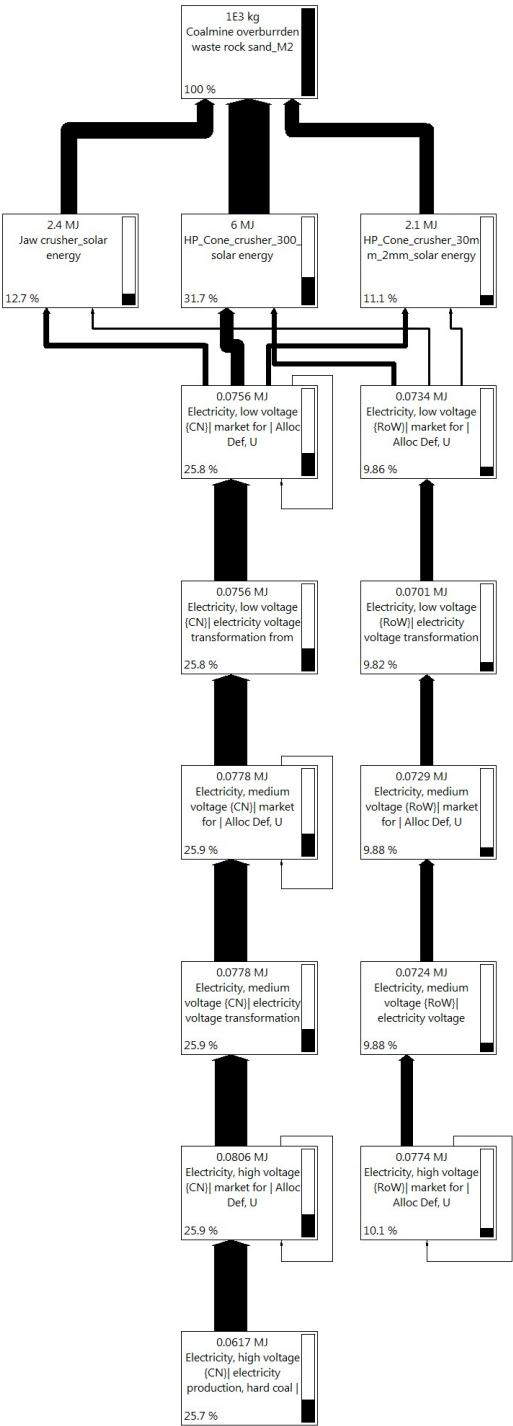

Eutrophication

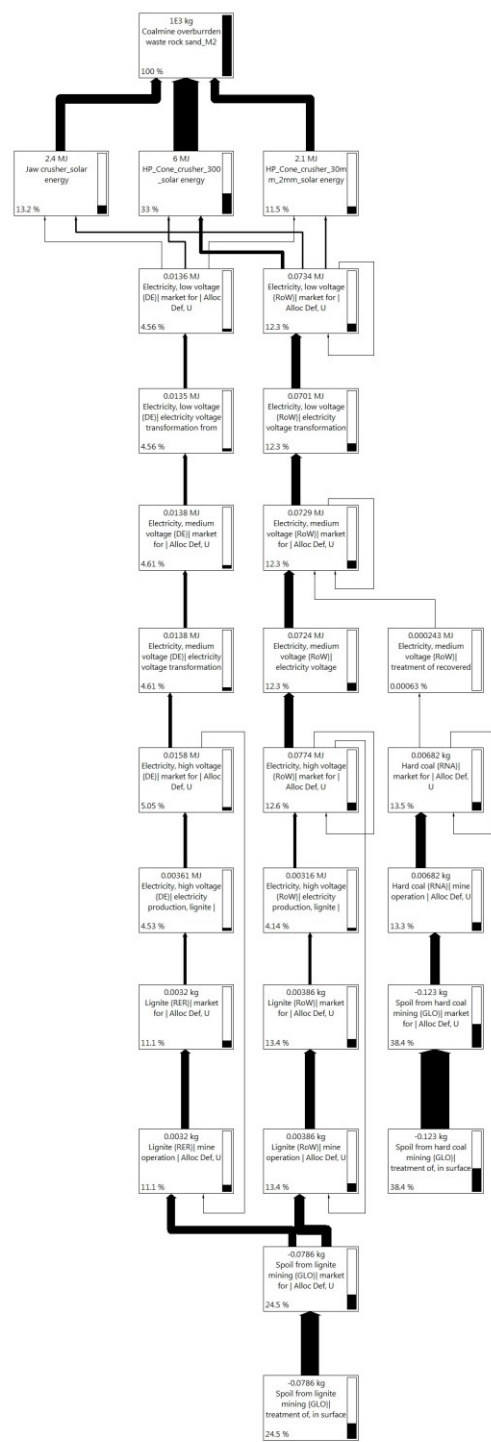

Supplement: s1 [file s1]
